# Supplementary material
Source: MDPI journal article supplement (https://www.mdpi.com/1996-1073/8/6/5459)
Supplement: s1 [file s1]

## Supplementary Materials

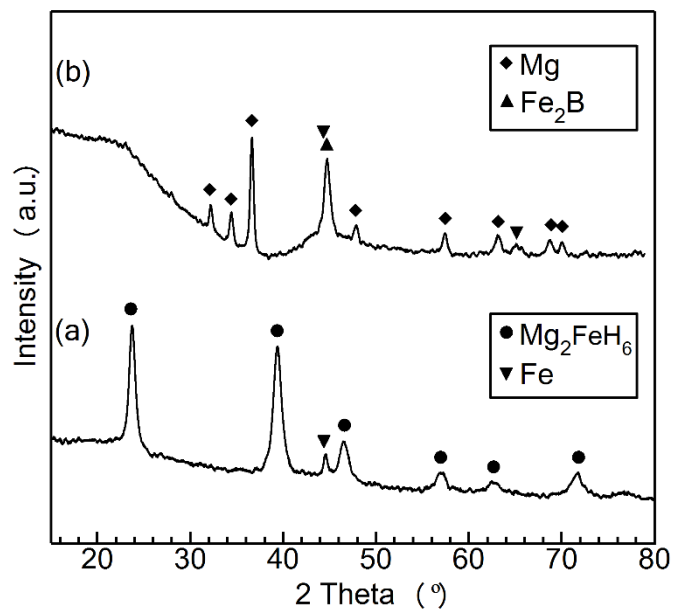

**Figure S1.** XRD profiles of  $0.75\text{Mg}_2\text{FeD}_6 + 0.25\text{LiBH}_4$ ; (a) as-ball-milled and (b) after the TG measurement at 400 °C.

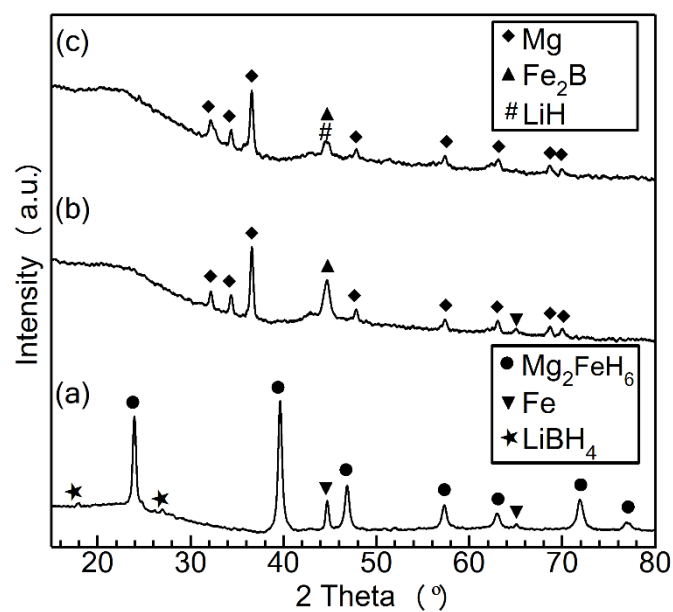

**Figure S2.** XRD profiles of  $0.75\text{LiBH}_4 + 0.25\text{Mg}_2\text{FeD}_6$ ; (a) as-ball-milled, (b) stopped at 370 °C in the TG measurement and (c) stopped at 420 °C after the TG measurement.

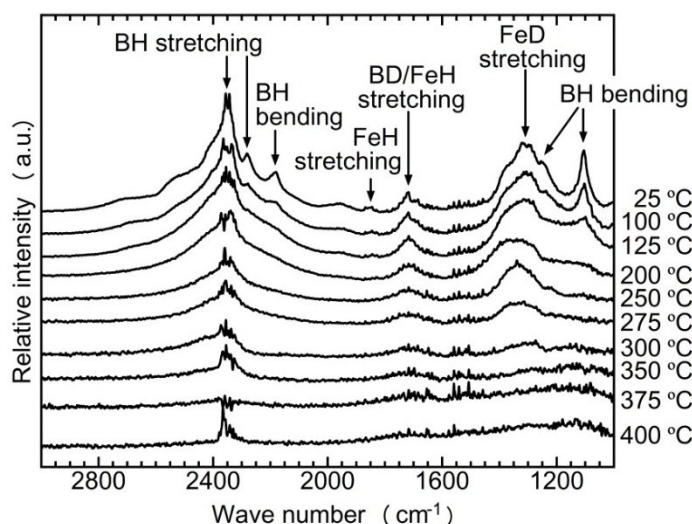

**Figure S3.** *In situ* IR spectra of  $0.75\text{LiBH}_4 + 0.25\text{Mg}_2\text{FeD}_6$ . Heating rate was  $5\text{ }^\circ\text{C}/\text{min}$ . The atmosphere in the sample holder was  $0.1\text{ MPa Ar}$  without gas flow.

The *in situ* IR spectra of  $0.75\text{LiBH}_4 + 0.25\text{Mg}_2\text{FeD}_6$  is shown in Figure S3. In the  $25\text{ }^\circ\text{C}$  spectrum, the merged BD and FeH stretching peaks at around  $1720\text{ cm}^{-1}$  indicate that H-D exchange occurred during ball milling. The splitting BH stretching peaks at  $\nu \approx 2320\text{ cm}^{-1}$ ,  $2290\text{ cm}^{-1}$  and  $2190\text{ cm}^{-1}$ , and the BH bending peaks at  $\nu = 1100\text{ cm}^{-1}$  and  $1250\text{ cm}^{-1}$  suggest that isotopically pure  $[\text{BH}_4]^-$  still existed. The peak at  $\nu = 1310\text{ cm}^{-1}$  is assigned to be FeD stretching mode. During the heating process, the BH stretching peaks merged and broadened after  $125\text{ }^\circ\text{C}$  because of H-D exchange promoted and phase transition of  $\text{LiBH}_4$  occurred. The FeD stretching peak shifted to higher wavelength and broadened obviously when comparing to the situation of  $x = 0.25$  because in this composition almost 5 D atoms in  $[\text{FeD}_6]^{4-}$  were replaced by H. At  $280\text{ }^\circ\text{C}$ , all of the peaks faded as a result of the dehydriding reaction, consistent with the TG-MS measurements shown in Figure 3 in the text. The peaks disappeared and the spectrum did not change further at  $400\text{ }^\circ\text{C}$ , suggesting completion of the dehydriding reaction. The noise at  $\nu \approx 2380\text{ cm}^{-1}$  was from the influence of  $\text{CO}_2$ . Also the spectra became quiet noisy after  $275\text{ }^\circ\text{C}$  because of the melting of  $\text{LiBH}_4$ .
